# Supplementary material for: Eu-MOF and its mixed-matrix membranes as a fluorescent sensor for quantitative ratiometric pH and folic acid detection, and visible fingerprint identifying
Source: Royal Society of Chemistry journal article supplement (doi:10.1039/d1qi00840d), 2021-01-01
Supplement: d1qi00840d1.pdf [file d1qi00840d1.pdf]

## Supporting Information

Eu-MOF and its mixed-matrix membranes as fluorescent sensor for quantitative ratiometric pH and folic acid detection, and visible fingerprint identifying

Yansong Jiang<sup>1,2†</sup>, Yating Huang<sup>1†</sup>, Xiangxiang Shi<sup>1</sup>, Zijing Lu<sup>3</sup>, Jiamo Ren<sup>1</sup>, Zimo Wang<sup>1</sup>, Jianing Xu<sup>1</sup>, Yong Fan<sup>1\*</sup>, Li Wang<sup>1\*</sup>

*1 College of Chemistry, Jilin University, Changchun, 130012, Jilin, China*

*2 South China Advanced Institute for Soft Matter Science and Technology, South China University of Technology, Guangzhou, 510640, Guangdong, China*

*3 Hubei Key Laboratory of Mineral Resources Processing and Environment, School of Resources and Environmental Engineering, Wuhan University of Technology, Wuhan, 430072, Hubei, China*

E-mail: lhl222@jlu.edu.cn; lwang99@jlu.edu.cn.

† These authors contributed equally to this work.

## Table of Contents

---

|                                                                                                                              |     |
|------------------------------------------------------------------------------------------------------------------------------|-----|
| <b>Experimental section</b>                                                                                                  | S3  |
| <b>Fig. S1</b> PXRD patterns of <b>1</b> .                                                                                   | S4  |
| <b>Fig. S2</b> PXRD patterns of <b>1@PCL</b> and <b>1@PVDF</b> .                                                             | S4  |
| <b>Fig. S3</b> TGA curve of <b>1</b> .                                                                                       | S4  |
| <b>Fig. S4</b> PXRD patterns of the product after TGA.                                                                       | S5  |
| <b>Fig. S5</b> The SEM images of as-synthesized <b>1</b> (a) and grind sample (b).                                           | S5  |
| <b>Fig. S6</b> The cross section SEM and EDS elemental mapping images.                                                       | S5  |
| <b>Fig. S7</b> The effect of ions and anions for FA detection.                                                               | S6  |
| <b>Fig. S8</b> PXRD patterns of <b>1</b> in different pH conditions.                                                         | S6  |
| <b>Fig. S9</b> PXRD pattern of <b>1</b> after FA detection.                                                                  | S6  |
| <b>Fig. S10</b> UV-vis spectrum of analytes.                                                                                 | S7  |
| <b>Fig. S11</b> The fluorescent spectrum of MMMs.                                                                            | S7  |
| <b>Fig. S12</b> The contact angle of MMMs.                                                                                   | S7  |
| <b>Fig. S13</b> The recycle experiment of <b>1</b> and MMMs.                                                                 | S8  |
| <b>Fig. S14</b> PXRD patterns of the recycled <b>1</b> and MMMs.                                                             | S8  |
| <b>Fig. S15</b> The photographs of MMMs in water or PBS.                                                                     | S8  |
| <b>Fig. S16</b> PXRD patterns of <b>1</b> , <b>1@PVDF</b> and <b>1@PCL</b> after exposed in air for four months.             | S9  |
| <b>Table S1</b> Crystal data and structure refinement for <b>1</b> .                                                         | S10 |
| <b>Table S2</b> The selected bond lengths for <b>1</b> .                                                                     | S11 |
| <b>Table S3</b> The selected bond angles for <b>1</b> .                                                                      | S12 |
| <b>Table S4</b> The mechanical property of MMMs.                                                                             | S13 |
| <b>Table S5</b> The comparison of the detection limit between <b>1</b> and other reported chemical sensors for FA detection. | S14 |
| <b>Reference</b>                                                                                                             | S14 |

---

## Experimental section

### Material and instruments

All chemical reagents were obtained from commercial sources and used without further purification. Powder X-ray diffraction (XRD) measurements were performed using a SHIMADZU XRD-6000 diffractometer with Cu-K $\alpha$  radiation ( $\lambda = 1.5418 \text{ \AA}$ ). FT-IR spectra were recorded on a Nicolet IS5 spectrometer between 4000 and 400 cm<sup>-1</sup> using the KBr pellet method. Elemental analyses (C, H and N) were performed using an Elementar Vario EL cube CHNOS elemental analyzer. Thermogravimetric analyses (TGA) were carried out using a PerkinElmer TGA 7 instrument, with a heating rate of 10 °C min<sup>-1</sup> under air atmosphere. Photoluminescence analyses were performed on an Edinburgh Instrument FLS 920 luminescence spectrometer. UV-vis absorption measurements were carried out on a Shimadzu UV-3100 spectrophotometer. Scanning electron microscopy (SEM) images and Energy-dispersive X-ray spectroscopy (EDS) were obtained with a JEOL JSM-IT500A instrument. The contact angle was determined with a KRÜSS GmbH DSA-25 instrument.

### Determination of crystal structure

A suitable single crystal of **1** was carefully picked out under an optical microscope for single crystal XRD analysis. The intensity data was collected on a Bruker P4 diffractometer with graphite-monochromated Mo-K $\alpha$  ( $\lambda = 0.71073 \text{ \AA}$ ) radiation at room temperature. The structure was solved by direct method and refined by full-matrix least-squares on  $F^2$  using OLEX2 equipped with the SHELXTL-2014 crystallographic software packages.[S1-S3] All the hydrogen atoms were placed geometrically and refined in a riding model. All of the non-hydrogen atoms were refined anisotropically. The crystal data and structure refinement for **1** is summarized in Table S1, selected bond lengths and angles are given in Tables S2–S3. CCDC-2081879, contains the supplementary crystallographic data for **1**.

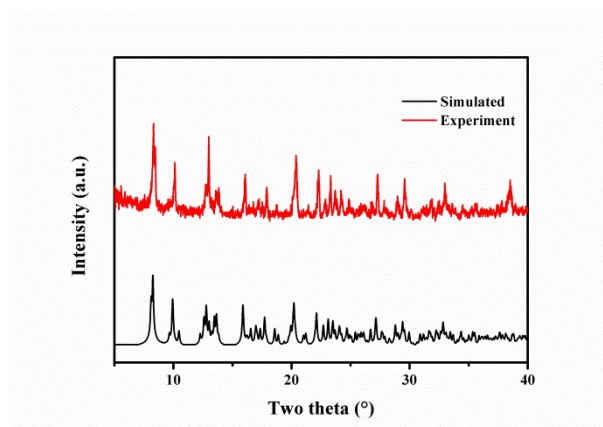

**Fig. S1** PXR D patterns of **1**.

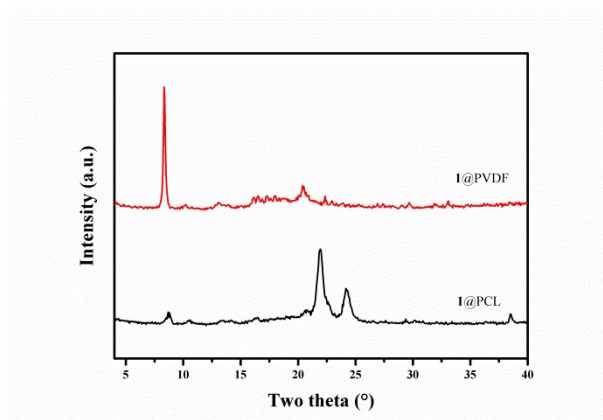

**Fig. S2** PXR D patterns of **1@PCL** and **1@PVDF**.

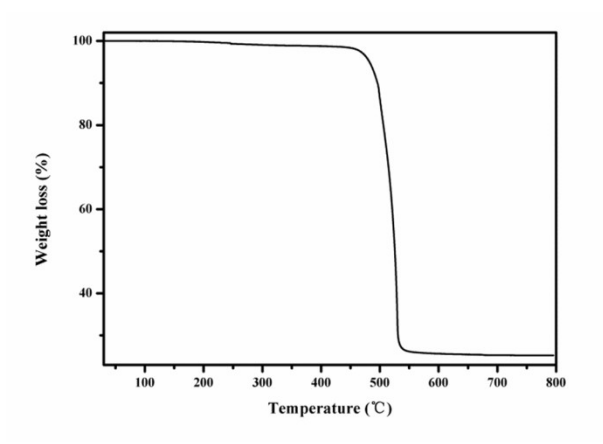

**Fig. S3** TGA curve of **1**.

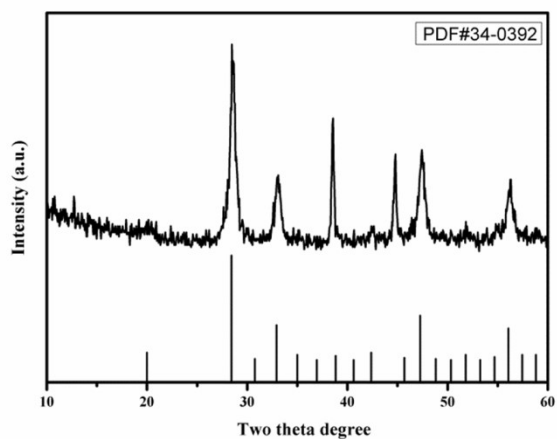

**Fig. S4** PXR D patterns of the product after TGA.

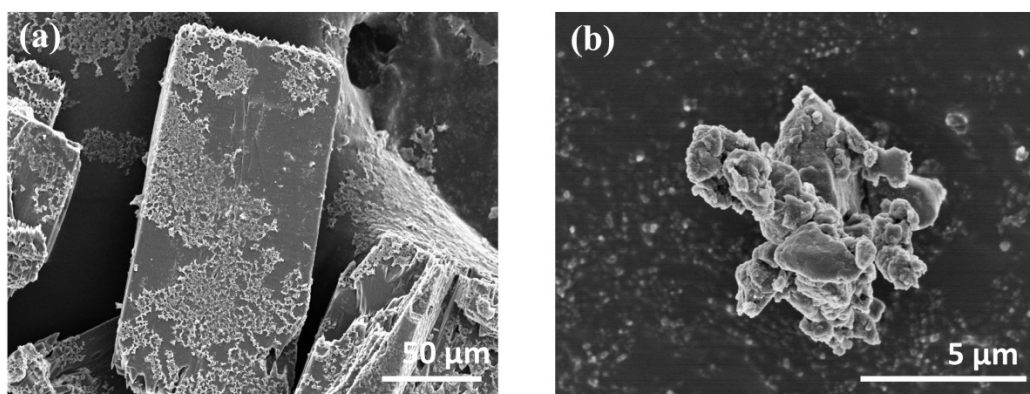

**Fig. S5** The SEM images of as-synthesized **1** (a) and grind sample (b).

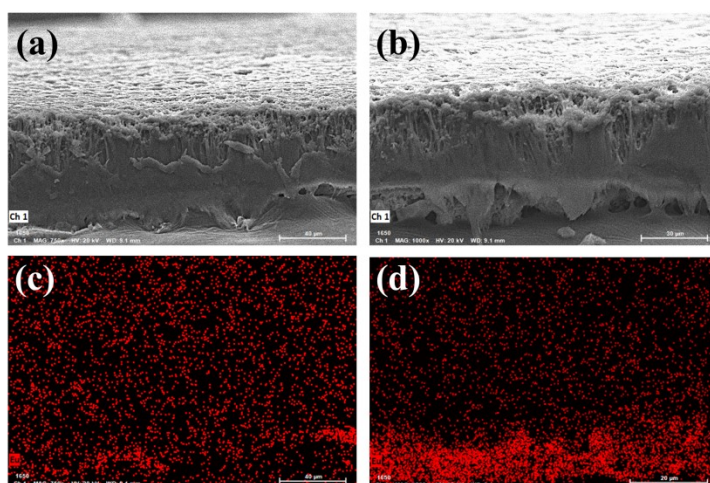

**Fig. S6** The cross section SEM images and EDS elemental mapping images (a, c)**1**@PVDF, (b, d)**1**@PCL.

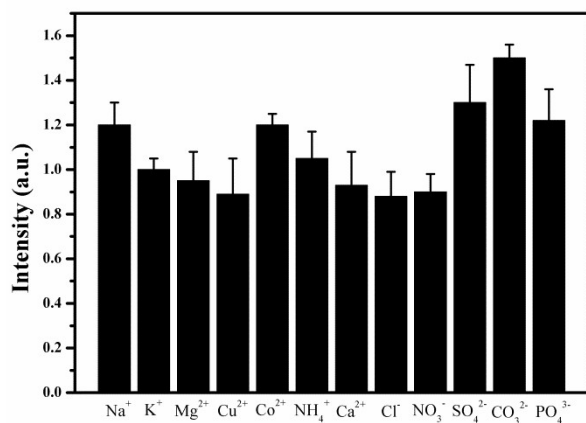

Fig. S7 The effect of ions and anions for FA detection.

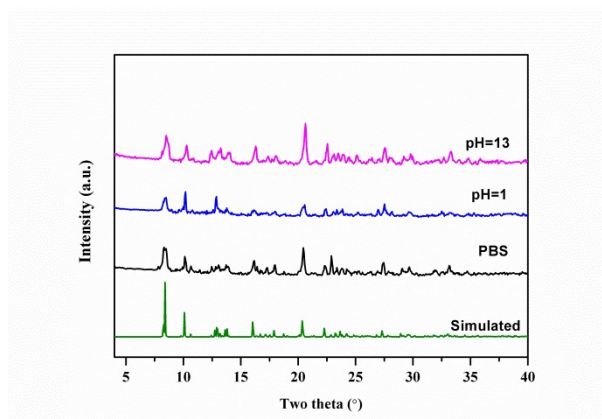

Fig. S8 PXRD patterns of 1 in different pH conditions.

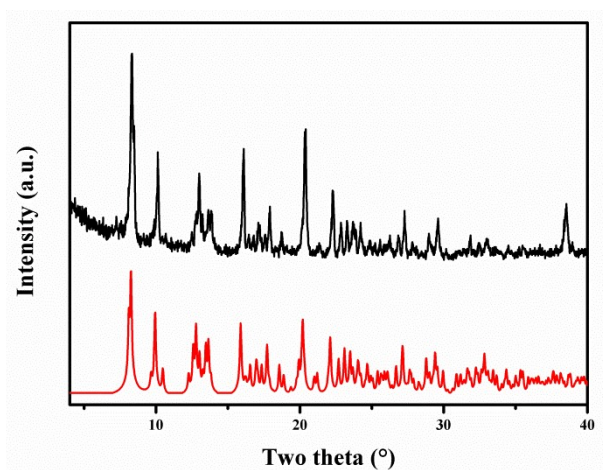

Fig. S9 PXRD pattern of 1 after FA detection.

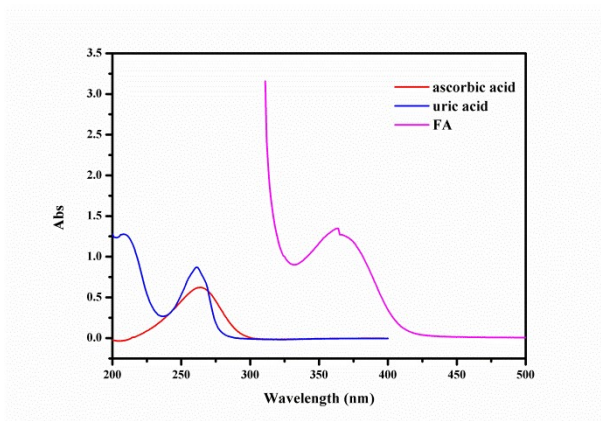

**Fig. S10** UV-vis spectrum of analytes.

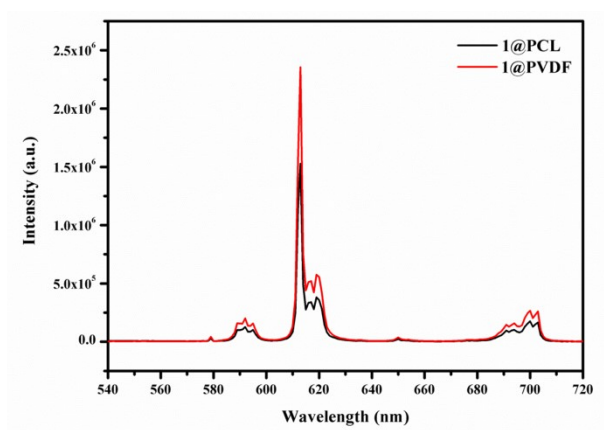

**Fig. S11** The fluorescent spectrum of MMMs.

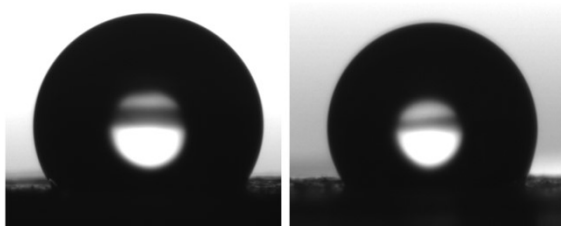

**Fig. S12** The contact angle of MMMs. **1@PCL** (left: 118.4°) and **1@PVDF** (right: 119.7°).

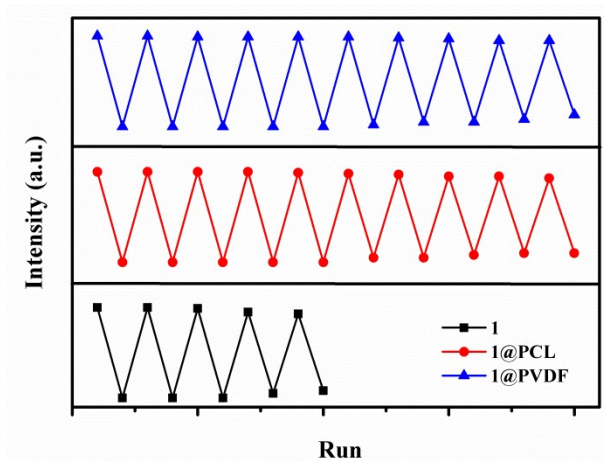

Fig. S13 The recycle experiment of **1** and MMMs.

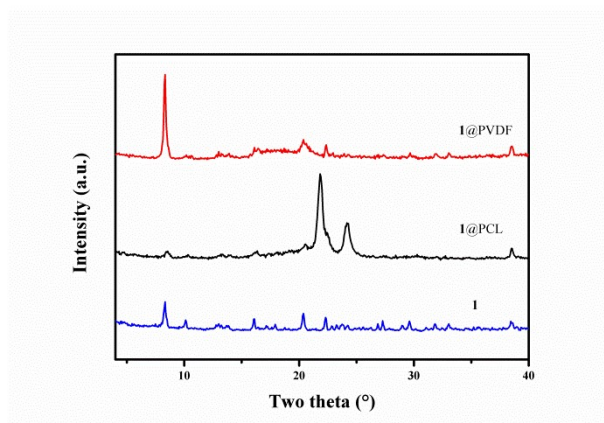

Fig. S14 PXR patterns of the recycled **1** and MMMs.

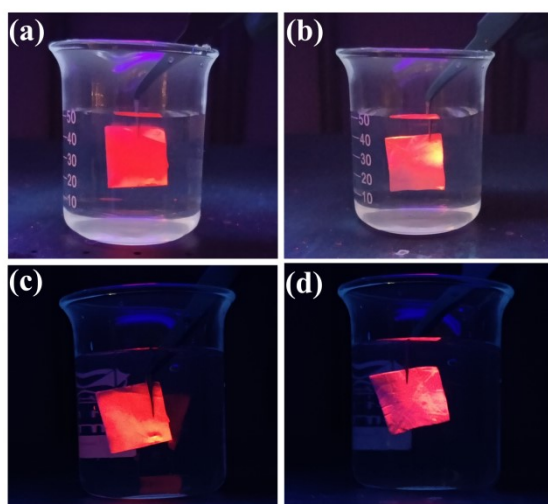

Fig. S15 The photographs of (a) **1**@PVDF in H<sub>2</sub>O, (b) **1**@PCL in H<sub>2</sub>O, (c) **1**@PVDF in PBS, (d) **1**@PCL in PBS.



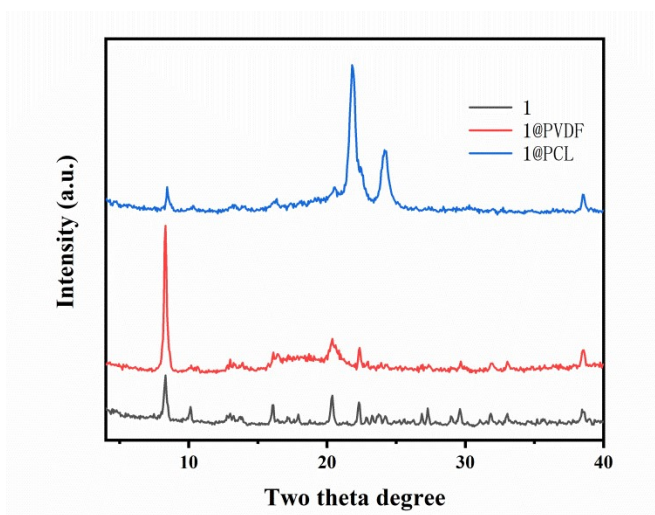

**Fig. S16** PXRD patterns of **1**, **1@PVDF** and **1@PCL** after exposed in air for four months.

**Table S1** Crystal data and structure refinement for **1**.

---

|                                             |                                                                 |
|---------------------------------------------|-----------------------------------------------------------------|
| Empirical formula                           | C <sub>34</sub> H <sub>19</sub> EuN <sub>2</sub> O <sub>8</sub> |
| Formula weight                              | 735.47                                                          |
| Temperature/K                               | 293(2) K                                                        |
| Crystal system                              | monoclinic                                                      |
| Space group                                 | P2 <sub>1</sub> /c                                              |
| <i>a</i> /Å                                 | 11.590(2)                                                       |
| <i>b</i> /Å                                 | 16.888(3)                                                       |
| <i>c</i> /Å                                 | 14.725(3)                                                       |
| $\alpha$ /°                                 | 90.00                                                           |
| $\beta$ /°                                  | 109.92(3)                                                       |
| $\gamma$ /°                                 | 90.00                                                           |
| Volume/Å <sup>3</sup>                       | 2709.7(9)                                                       |
| Z                                           | 4                                                               |
| $\rho_{\text{calc}}$ /g/cm <sup>3</sup>     | 1.803                                                           |
| $\mu$ /mm <sup>-1</sup>                     | 2.377                                                           |
| F(000)                                      | 1456.0                                                          |
| Crystal size/mm <sup>3</sup>                | 0.6 × 0.3 × 0.3                                                 |
| Radiation                                   | MoK $\alpha$ ( $\lambda$ = 0.71073)                             |
| 2 $\Theta$ range for data collection/°      | 6 to 54.86                                                      |
| Index ranges                                | -14 ≤ <i>h</i> ≤ 14, -21 ≤ <i>k</i> ≤ 21, -16 ≤ <i>l</i> ≤ 19   |
| Reflections collected                       | 23474                                                           |
| Independent reflections                     | 6014 [ $R_{\text{int}}$ = 0.0623, $R_{\text{sigma}}$ = 0.0541]  |
| Data/restraints/parameters                  | 6014/0/406                                                      |
| Goodness-of-fit on F <sup>2</sup>           | 1.031                                                           |
| Final R indexes [ $I \geq 2\sigma(I)$ ]     | $R_1$ = 0.0351, $wR_2$ = 0.0630                                 |
| Final R indexes [all data]                  | $R_1$ = 0.0504, $wR_2$ = 0.0689                                 |
| Largest diff. peak/hole / e Å <sup>-3</sup> | 0.62/-1.75                                                      |

---

**Table S2** The selected bond lengths for **1**.

| <b>Atom</b> | <b>Atom</b>      | <b>Length/Å</b> |
|-------------|------------------|-----------------|
| Eu1         | Eu1 <sup>1</sup> | 4.2067(7)       |
| Eu1         | O1               | 2.450(3)        |
| Eu1         | O2               | 2.442(3)        |
| Eu1         | O8 <sup>2</sup>  | 2.356(3)        |
| Eu1         | O4 <sup>3</sup>  | 2.325(3)        |
| Eu1         | O7 <sup>4</sup>  | 2.303(3)        |
| Eu1         | O3 <sup>5</sup>  | 2.369(3)        |
| Eu1         | N1               | 2.614(4)        |
| Eu1         | N2               | 2.543(3)        |
| Eu1         | C8               | 2.812(4)        |
| Eu1         | C22 <sup>2</sup> | 3.140(4)        |
| O1          | C8               | 1.257(5)        |
| O2          | C8               | 1.271(5)        |
| O8          | Eu1 <sup>6</sup> | 2.356(3)        |
| O8          | C22              | 1.243(5)        |
| O4          | Eu1 <sup>7</sup> | 2.325(3)        |
| O4          | C7               | 1.260(5)        |
| O7          | Eu1 <sup>8</sup> | 2.303(3)        |
| O7          | C22              | 1.263(5)        |
| O3          | Eu1 <sup>9</sup> | 2.369(3)        |

<sup>1</sup>1-X,1-Y,2-Z; <sup>2</sup>1+X,1/2-Y,1/2+Z; <sup>3</sup>1-X,1/2+Y,3/2-Z; <sup>4</sup>-X,1/2+Y,3/2-Z; <sup>5</sup>+X,1/2-Y,1/2+Z; <sup>6</sup>-1+X,1/2-Y,-1/2+Z; <sup>7</sup>1-X,-1/2+Y,3/2-Z; <sup>8</sup>-X,-1/2+Y,3/2-Z; <sup>9</sup>+X,1/2-Y,-1/2+Z

**Table S3** The selected bond angles for **1**.

| Atom            | Atom | Atom             | Angle/°    | Atom            | Atom | Atom             | Angle/°    |
|-----------------|------|------------------|------------|-----------------|------|------------------|------------|
| O1              | Eu1  | N1               | 76.76(10)  | O7 <sup>5</sup> | Eu1  | O8 <sup>2</sup>  | 125.84(11) |
| O1              | Eu1  | N2               | 89.96(11)  | O7 <sup>5</sup> | Eu1  | O4 <sup>4</sup>  | 74.27(10)  |
| O1              | Eu1  | C8               | 26.50(10)  | O7 <sup>5</sup> | Eu1  | O3 <sup>3</sup>  | 79.98(10)  |
| O1              | Eu1  | C22 <sup>2</sup> | 164.21(10) | O7 <sup>5</sup> | Eu1  | N1               | 144.01(11) |
| O2              | Eu1  | O1               | 53.32(9)   | O7 <sup>5</sup> | Eu1  | N2               | 146.89(11) |
| O2              | Eu1  | N1               | 112.59(10) | O7 <sup>5</sup> | Eu1  | C8               | 77.88(11)  |
| O2              | Eu1  | N2               | 73.46(11)  | O7 <sup>5</sup> | Eu1  | C22 <sup>2</sup> | 106.31(11) |
| O2              | Eu1  | C8               | 26.84(10)  | O3 <sup>3</sup> | Eu1  | O1               | 129.73(10) |
| O2              | Eu1  | C22 <sup>2</sup> | 140.34(10) | O3 <sup>3</sup> | Eu1  | O2               | 76.70(9)   |
| O8 <sup>2</sup> | Eu1  | O1               | 145.82(10) | O3 <sup>3</sup> | Eu1  | N1               | 135.46(10) |
| O8 <sup>2</sup> | Eu1  | O2               | 141.96(10) | O3 <sup>3</sup> | Eu1  | N2               | 79.71(10)  |
| O8 <sup>2</sup> | Eu1  | O3 <sup>3</sup>  | 78.00(10)  | O3 <sup>3</sup> | Eu1  | C8               | 103.31(11) |
| O8 <sup>2</sup> | Eu1  | N1               | 69.07(11)  | O3 <sup>3</sup> | Eu1  | C22 <sup>2</sup> | 65.32(10)  |
| O8 <sup>2</sup> | Eu1  | N2               | 74.43(11)  | N1              | Eu1  | C8               | 95.50(11)  |
| O8 <sup>2</sup> | Eu1  | C8               | 155.50(11) | N1              | Eu1  | C22 <sup>2</sup> | 88.51(11)  |
| O8 <sup>2</sup> | Eu1  | C22 <sup>2</sup> | 20.43(10)  | N2              | Eu1  | N1               | 63.40(11)  |
| O4 <sup>4</sup> | Eu1  | O1               | 89.74(10)  | N2              | Eu1  | C8               | 81.70(11)  |
| O4 <sup>4</sup> | Eu1  | O2               | 135.10(10) | N2              | Eu1  | C22 <sup>2</sup> | 88.43(11)  |
| O4 <sup>4</sup> | Eu1  | O8 <sup>2</sup>  | 82.90(11)  | O4 <sup>4</sup> | Eu1  | C8               | 112.60(11) |
| O4 <sup>4</sup> | Eu1  | O3 <sup>3</sup>  | 129.36(10) | O4 <sup>4</sup> | Eu1  | C22 <sup>2</sup> | 81.10(11)  |
| O4 <sup>4</sup> | Eu1  | N1               | 76.00(10)  | O7 <sup>5</sup> | Eu1  | O1               | 83.25(11)  |
| O4 <sup>4</sup> | Eu1  | N2               | 138.29(11) | O7 <sup>5</sup> | Eu1  | O2               | 76.58(10)  |

<sup>1</sup>1-X,1-Y,2-Z; <sup>2</sup>1+X,1/2-Y,1/2+Z; <sup>3</sup>+X,1/2-Y,1/2+Z; <sup>4</sup>1-X,1/2+Y,3/2-Z; <sup>5</sup>-X,1/2+Y,3/2-Z; <sup>6</sup>-1+X,1/2-Y,-1/2+Z; <sup>7</sup>1-X,-1/2+Y,3/2-Z; <sup>8</sup>-X,-1/2+Y,3/2-Z; <sup>9</sup>+X,1/2-Y,-1/2+Z

**Table S4** The mechanical property of MMMs.

|               | F <sub>m</sub> | σ <sub>m</sub> | ε <sub>m</sub> | E <sub>t</sub> | ε <sub>b</sub> | F <sub>b</sub> | σ <sub>b</sub> | U <sub>b</sub> |
|---------------|----------------|----------------|----------------|----------------|----------------|----------------|----------------|----------------|
|               | (N)            | (MPa)          | (%)            | (MPa)          | (%)            | (N)            | (MPa)          | (mJ)           |
| <b>1@PCL</b>  | 4.10           | 1.02           | 48             | 7.64           | 68             | 1.30           | 0.325          | 20.2           |
| <b>1@PVDF</b> | 6.25           | 10.4           | 6.1            | 408            | 140            | -0.0150        | -0.0250        | 40.8           |

**Table S5** The comparison of the detection limit between **1** and other reported chemical sensors for FA detection.

| Materials                         | Detection limit (M)      | Reference |
|-----------------------------------|--------------------------|-----------|
| Y <sub>2</sub> O <sub>3</sub> :Eu | 0.083 × 10 <sup>-6</sup> | S4        |
| CdTe                              | 0.095 × 10 <sup>-6</sup> | S5        |
| Carbon dots                       | 1.2 × 10 <sup>-6</sup>   | S6        |
| ZnS: Mn or Cu                     | 1.1 × 10 <sup>-5</sup>   | S7        |
| CdInS <sub>2</sub> QDs            | 8 × 10 <sup>-5</sup>     | S8        |
| 1,10-phenantroline-Tb(III)-Ag NPs | 0.21 × 10 <sup>-6</sup>  | S9        |
| MoS <sub>2</sub> QDs              | 0.1 × 10 <sup>-3</sup>   | S10       |

## Reference

[S1] O.V. Dolomanov, L.J. Bourhis, R.J. Gildea, J.A.K. Howard, H. Puschmann, OLEX2: a complete structure solution, refinement and analysis program, *Journal of Applied Crystallography*, 2009, 42, 339-341.

[S2] G. Sheldrick, Crystal structure refinement with SHELXL, *Acta Crystallographica Section C*, 2015, 71, 3-8.

[S3] G. Sheldrick, A short history of SHELX, *Acta Crystallographica Section A*, 2008, 64, 112-122.

[S4] F. Gudarzy, A.B. Moghaddam, S. Mozaffari, *et al.* A lanthanide nanoparticle-based luminescent probe for folic acid. *Microchim Acta* 2013,180, 1257–1262.

[S5] P. Nagaraja, R.A. Vasantha. Spectrophotometric determination of folic acid in pharmaceutical preparations by coupling reactions with iminodibenzyl or 3-aminophenol or sodium molybdate–pyrocatechol. *Anal Biochem* 2002, 307, 316–321.

[S6] S.Y. Liu, J.J. Hu, X.G. Su Detection of ascorbic acid and folic acid based on water-soluble CuInS<sub>2</sub> quantum dots. *Analyst* 2012, 137, 4598–4604.

[S7] B. Zeng, F. Zhao. Single-walled carbon nanotube-ionic liquid paste electrode for the sensitive voltammetric determination of folic acid. *Sens Actuat B* 2008, 134, 895–901.

[S8] S.Q. Han, X.X. Chen. Copper nanoclusters-enhanced chemiluminescence for folic acid and nitrite detection. *Spectrochim Acta A* 2019, 210, 315–320.

[S9] Y. Ganjkhanlou, M. Kazemzad, F. Alikhani Hessari. Chromaticity dependence on Eu concentration in Y<sub>2</sub>O<sub>3</sub>:Eu nanopowders. *Nano: Brief Report Rev* 2010, 5, 111–116.

[S10] Y. Peng, W. Dong, L. Wan, *et al.* Determination of folic acid via its quenching effect on the fluorescence of MoS<sub>2</sub> quantum dots. *Microchim Acta* 2019,186, 605.
